# Supplementary material
Source: Springer Nature journal article supplement (https://www.springermedizin.de/resource/supplementary/12936_2010_1686_MOESM5_ESM.pdf/9542380)

**Proportion of Cases**

- 0 - 5
- 5 - 15
- 15 - 25
- 25 - 35
- 35 - 45
- 45 - 212

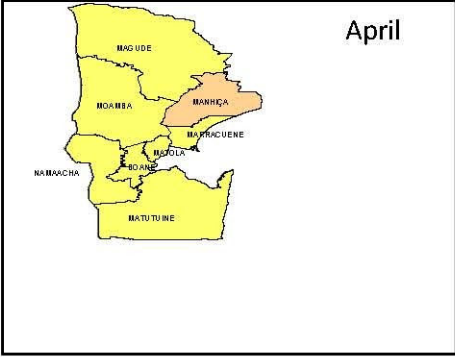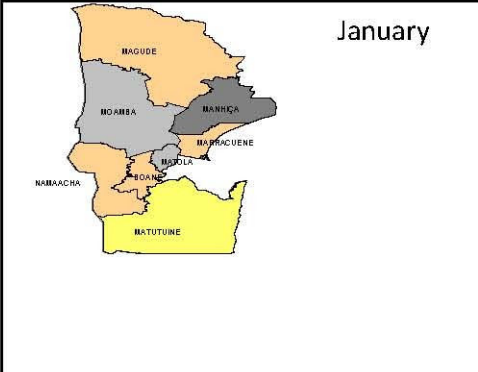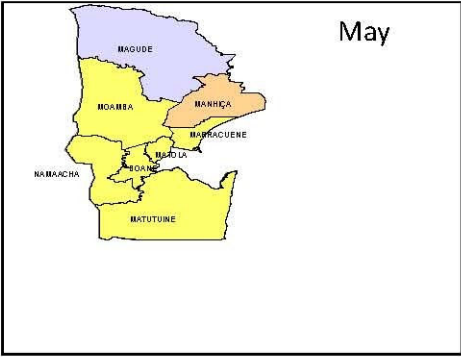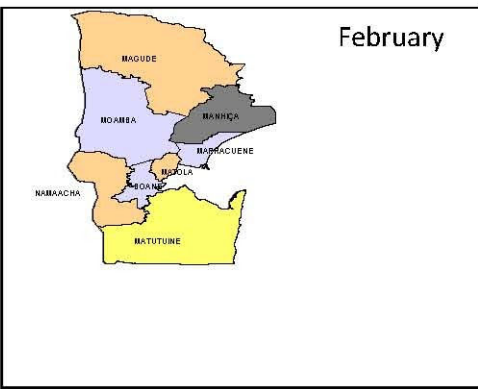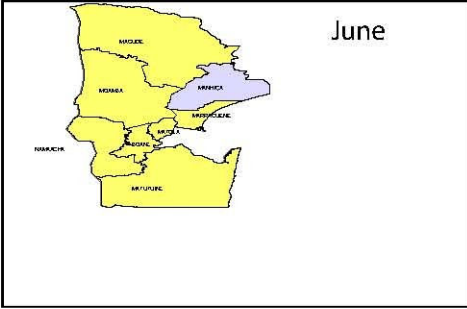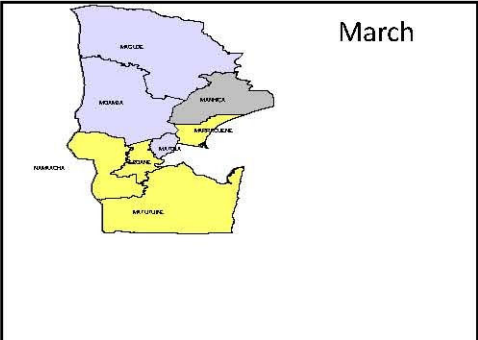

Supplement: MOESM5 [file 9542380]
